# Supplementary material for: Superior energy storage properties in lead-free NaNbO3-based relaxor antiferroelectric ceramics via a combined optimization strategy
Source: Royal Society of Chemistry journal article supplement (doi:10.1039/d3tc04558g), 2024-01-01
Supplement: d3tc04558g1.pdf [file d3tc04558g1.pdf]

## Supporting Information

# Superior Energy Storage Properties in Lead-free $\text{NaNbO}_3$ -based Relaxor Antiferroelectric Ceramics via Combined Optimization Strategy

Huanwei Liu<sup>a,†</sup>, Xiang Niu<sup>a,†</sup>, Ting Wang<sup>b</sup>, Yi Tang<sup>a</sup>, Zihao Xu<sup>c</sup>, Xubing Lu<sup>c</sup>, Xiangbin Zhang<sup>d</sup>, Wenhan Zeng<sup>a</sup>, Mingtao Xu<sup>a</sup>, Houzhu He<sup>a</sup>, Yuleng Jiang<sup>a</sup>, Weiping Gong<sup>b</sup>, Xiaobo Zhao<sup>a</sup>, Yingbang Yao<sup>a</sup>, Tao Tao<sup>a</sup>,  
Bo Liang<sup>a</sup>, and Sheng-Guo Lu<sup>a\*</sup>

<sup>a</sup>Guangdong Provincial Research Center on Smart Materials and Energy Conversion Devices, School of Materials and Energy, Guangdong University of Technology, Guangzhou, 510006, China;

<sup>b</sup>Guangdong Provincial Key Laboratory of Electronic Functional Materials and Devices, Huizhou University, Huizhou, Guangdong, 516001, China

<sup>c</sup>Institute for Advanced Materials, South China Academy of Advanced Optoelectronics and Guangdong Provincial Key Laboratory of Optical Information Materials, South China Academy of Advanced Optoelectronics, South China Normal University, Guangzhou 510006, China.

<sup>d</sup>Guangdong Provincial Key Laboratory of Quantum Engineering and Quantum Materials, and Institute for Advanced Materials, South China Normal University, Guangzhou 510006, China.

<sup>†</sup>Huanwei Liu and Xiang Niu contributed equally to this work.

\* Corresponding author.

Sheng-Guo Lu, [Email: sglu@gdut.edu.cn](mailto:sglu@gdut.edu.cn)

## Material and methods

The  $(1-x)\text{NaNbO}_3-x(0.58(\text{Bi}_{0.5}\text{Na}_{0.5})\text{TiO}_3-0.06\text{BaTiO}_3-0.2\text{SrTiO}_3-0.16\text{Bi}(\text{Mg}_{0.5}\text{Zr}_{0.5})\text{O}_3)$  (NN- $x$ ) ( $x = 0.20, 0.25, 0.30, 0.35$ ) ceramics were fabricated using a conventional solid-state reaction approach. The raw materials of  $\text{Na}_2\text{CO}_3$  (99.8%, Aladdin, Shanghai, China),  $\text{Nb}_2\text{O}_5$  (99.9%, Aladdin, Shanghai, China),  $\text{Bi}_2\text{O}_3$  (99.0%, Aladdin, Shanghai, China),  $\text{TiO}_2$  (99.0%, Aladdin, Shanghai, China),  $\text{BaCO}_3$  (99.0%, Aladdin, Shanghai, China),  $\text{SrCO}_3$  (99.0%, Aladdin, Shanghai, China),  $\text{MgO}$  (98.0%, Aladdin, Shanghai, China),  $\text{ZrO}_2$  (99.0%, Aladdin, Shanghai, China) were weighted in accordance with their stoichiometries. After mixing with ethanol solvent and  $\text{ZrO}_2$  balls, the powders were uniformly mixed in a plastic bottle and ball-milled at 220 rpm for 12 h in a planetary ball miller. Afterwards, the slurry was dried at 80 °C for 10 h. The powder was calcined at 850 °C for 3 h and then ball-milled again for 12 h. Then, 5% polyvinyl butyral (PVB) was used as a binder and the granulated powders were pressed into disks with 10 mm in diameter and ~ 1 mm in thickness under an axial pressure of 6 MPa. Whereafter, isostatic pressing at 200 MPa was carried out for further pre-densification of the green ceramic. Finally, the disks were sintered in the temperature range from 1080 °C to 1120 °C for 10 h after burnout of PVB at 600 °C for 1 h.

The best composition ( $x = 0.30$ ) was selected and the tape-casting method was used to prepare the thick film ceramics. The tape-casting slurry consisted of the second ball-milled NN matrix powders, solvent (butanone and ethanol), binder and plasticizer ball milled for 24 h, then the slurry was tape-cast into a green belt and dried. Then the green belt was screen printed, cut into pieces, and sintered for 6 h to get the thick film ceramics.

The polycrystalline structure of the NN- $x$  was characterized using an X-ray diffractometer (XRD, Rigaku Ultima IV diffractometer) with the  $\text{Cu K}\alpha$  radiation. The surface morphologies of various specimens were characterized using a scanning electron microscope (SEM, Hitachi S-3400N) and the grain size distributions were statistically analyzed using an ImageJ software. Raman spectra were collected at room temperature on polished pellets by 532-nm excitation using a Raman spectrometer (LabRam HR Evolution, HORIBA JOBIN YVON, Longjumeau Cedex, France). Temperature-dependent dielectric properties and impedances were procured using a dielectric property measurement system

(DMS-500, Partulab, Wuhan, China) at 1, 5, 10, 50, and 100 kHz from -120 °C to 150 °C with a heating rate of 3 °C /min.

A transmission electron microscope (TEM, Talos F200S) was used to obtain the electron diffraction patterns. For ESP measurements, the bulk samples were polished to ~100 μm in thickness, while the thickness of sintered thick film samples were ~12 μm. Both sides of specimens were covered by gold electrodes with a diameter of 2 mm. The polarization-electric field (*P-E*) hysteresis loops were recorded by a Sawyer-Tower circuit (RADIANT Multiferroic Test System). The sintered ceramics were ground to powder for ultraviolet-visible (UV-vis) absorbance spectra (UV3600 Plus, Shimadzu). The surface morphology and domain structure were characterized by AFM and PFM, respectively, which were performed on an integrated scanning probe microscope (Asylum Research MFP-3D) with Pt-coated silicon tips (Nanoworld EFM Arrow).

## Figures

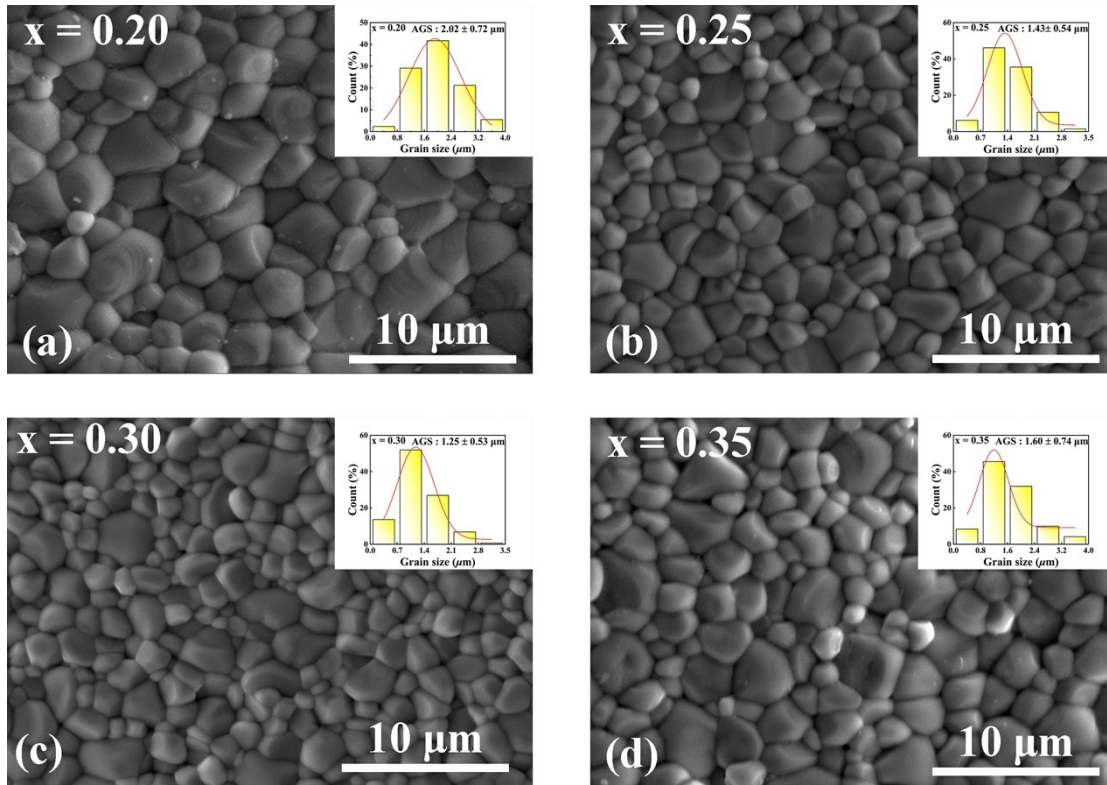

Figure S1 (a)-(d) Scanning electron microscope (SEM) images of various compositions. The inset of each figure corresponds to the statistical analysis of grain size distribution for each sample.

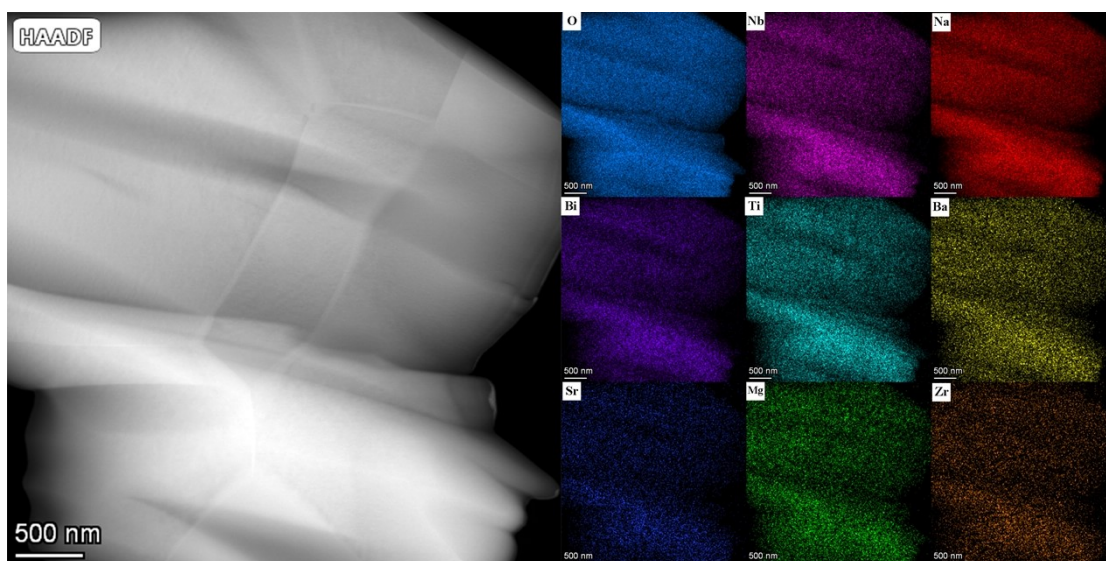

Figure S2 Bright-field TEM image and EDS mappings of each element for  $x=0.30$  ceramic.
